# Supplementary material for: Sex-specific effects of polygenic risk for schizophrenia on lifespan cognitive functioning in healthy individuals
Source: PubMed Central journal article supplement (PMC8505489; doi:10.1038/s41398-021-01649-4), 2021-10-11

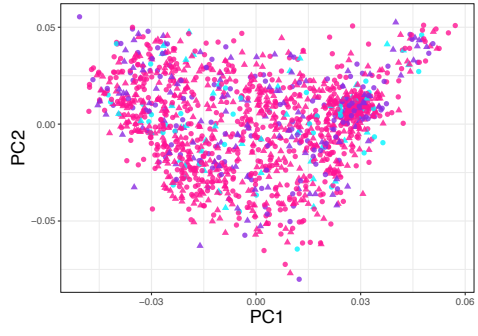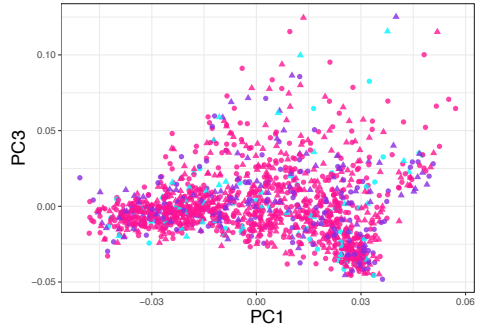

**Dataset**  
● batch 1  
● batch 1 and 2  
● batch 2

**Sex**  
● female  
▲ male

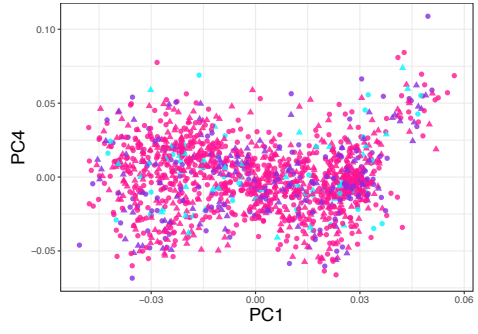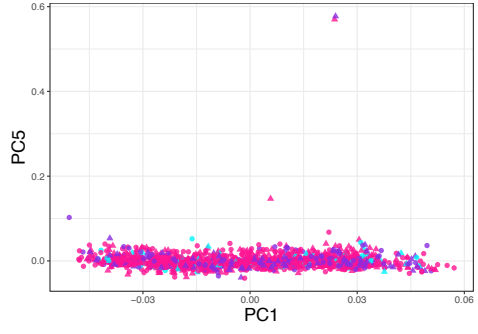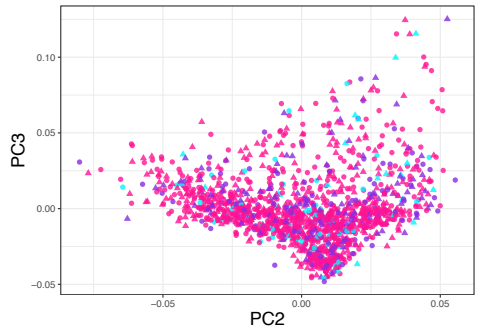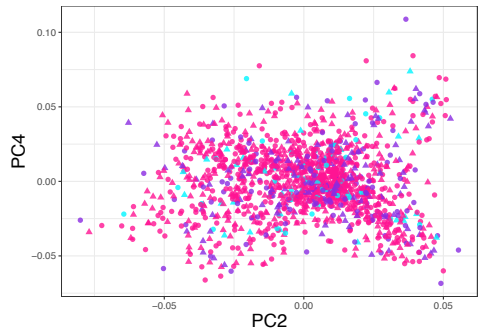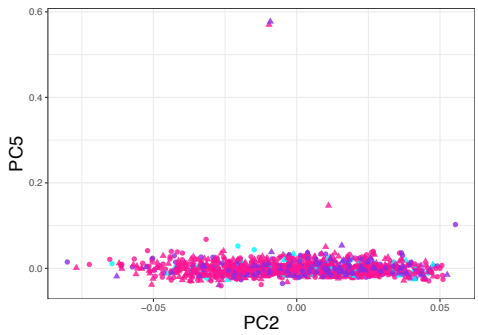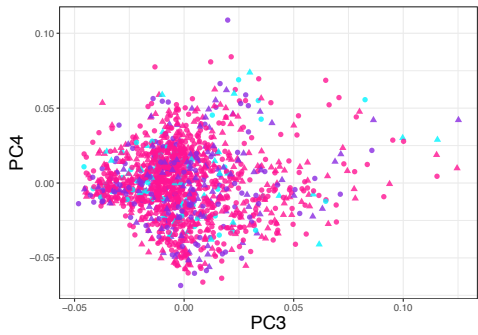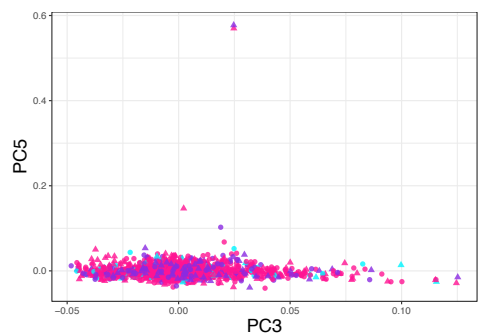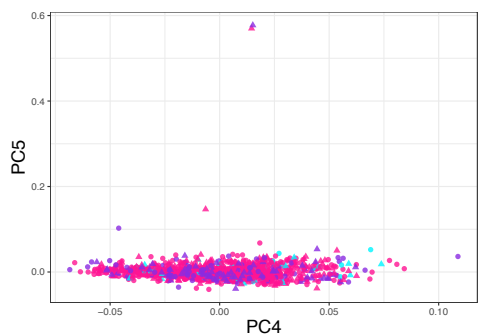

Supplement: 41398_2021_1649_MOESM2_ESM.pdf [file 41398_2021_1649_MOESM2_ESM.pdf]
