# Supplementary material for: Sex-specific effects of polygenic risk for schizophrenia on lifespan cognitive functioning in healthy individuals
Source: PubMed Central journal article supplement (PMC8505489; doi:10.1038/s41398-021-01649-4), 2021-10-11
Supplement: 41398_2021_1649_MOESM3_ESM.pdf [file 41398_2021_1649_MOESM3_ESM.pdf]

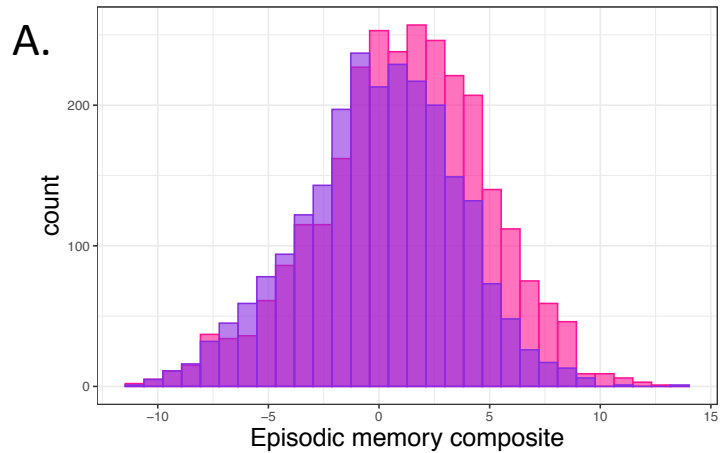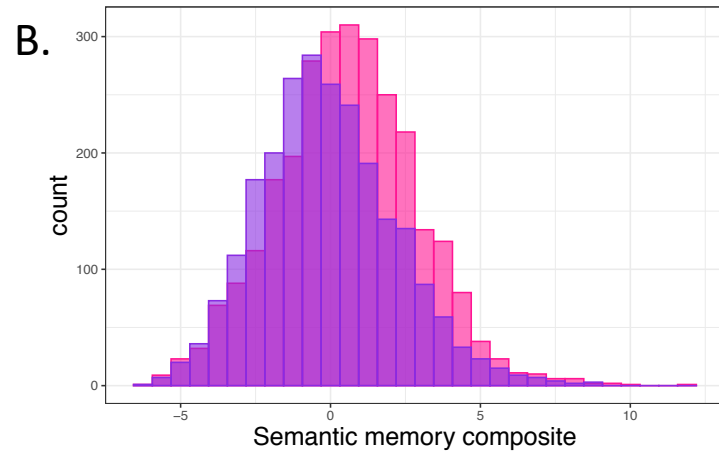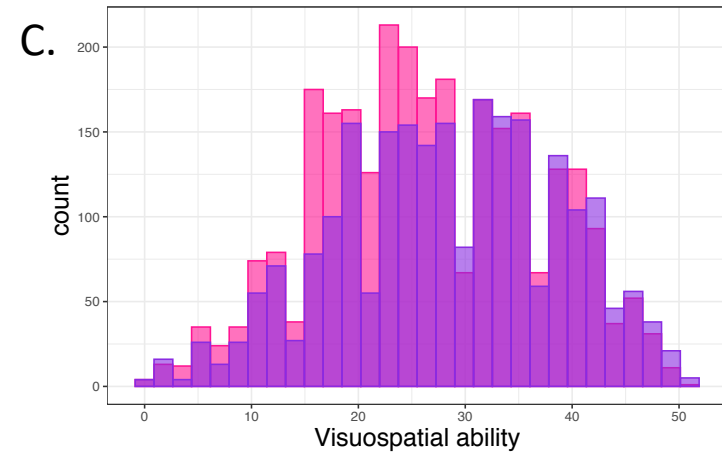

Sex

- female
- male
